# Supplementary material for: Comprehensive Analysis Identifies the PPAR-Targeted Genes Associated with Ovarian Cancer Prognosis and Tumor Microenvironment
Source: Hindawi journal article supplement (doi:10.1155/2023/6637414), 2023-05-11
Supplement: f1 [file 6637414.f1.pdf]

# Supplementary file

## Figure S1

**A**

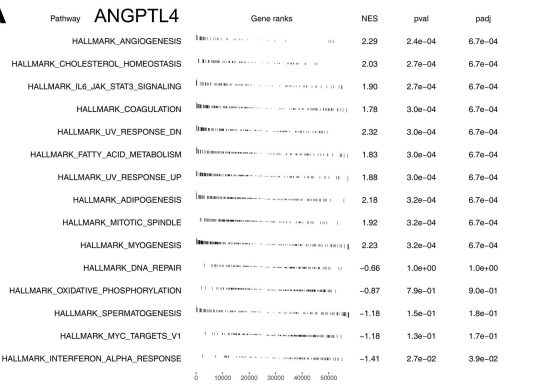

**B**

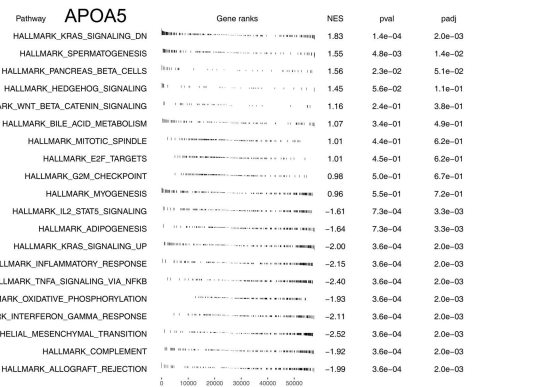

**C**

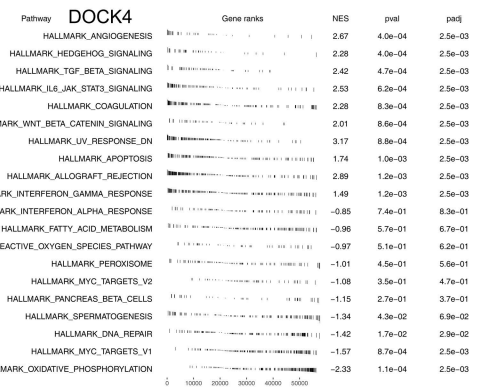

**D**

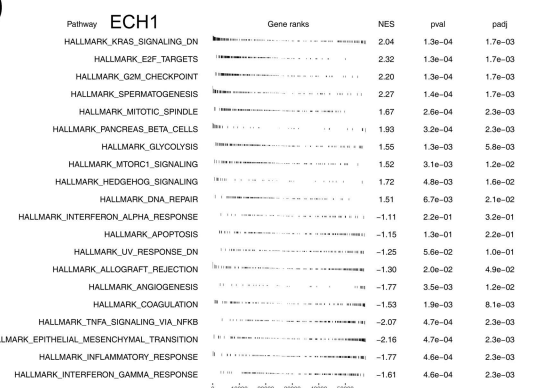

**E**

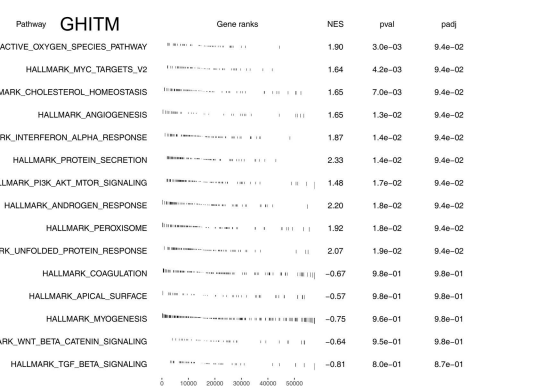

**F**

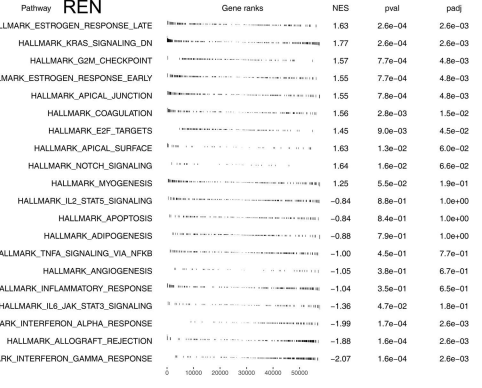

**G**

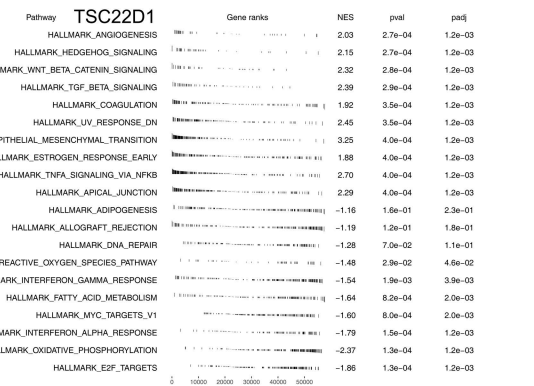

**H**

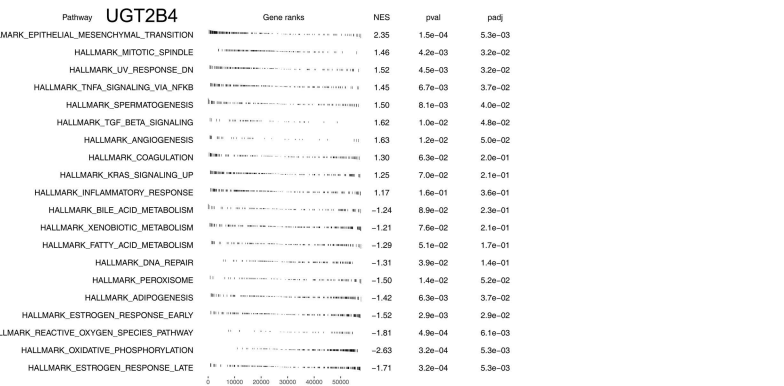

**Table S1. The list of PPAR-related genes**

GYS2, HMOX1, SLC25A20, NPC1L1, SLC29A1, DBI, UCP3, FABP6, PLIN2, CPT1B, APOA1, AHR, CYP1A1, UGDH, ACOX1, GPT, FADS2, PDZK1, CREB3L3, KLF10, KLF11, MAP3K8, APOA5, C3, CYP7A1, ACADM, TXN, ABCG2, TF, RETSAT, NR1D1, SULT2A1, AP2A2, CPT2, UGT1A9, UGT2B4, CYP3A4, ASS1, TSC22D1, GPD1, G0S2, HCAR1, NAMPT, INSR, TFF2, PGK1, PKM, APOE, PTGS2, LRP1, SCARB1, SGK1, BRCA1, SAT1, BCL2, CAV1, CYP27A1, GHITM, VEGFA, TXNIP, SDC1, REN, CDKN1A, SHBG, GCK, SLC9A1, CAT, SLC22A5, CTSL1, TNFSF10, TNIP1, KLF4, IRF1, AK3, APH1B, CTBS, CYB5D2, DIAPH1, DOCK4, ECH1, ETFB, HSDL2, IMPA2, ISCA1, MLYCD, MYO18A, NUDT13, NUDT9, PPARG, RUNX1, SYTL3, TIMP4, TTC33, UROS, ZNF354A, ZNF367, ABCA1, ACSL5, ANGPTL4, AP2A1, ETFDH, PDK4, PLIN1, TMEM135, VAMP8, AHNAK, BIRC3, CDKN2C, BLOC1S4, CSNK1G2, DCP1A, EXOC6B, GPR180, GRAMD3, IFIT2, TALDO1, TNFRSF1A, PDK2, PDK3, HBEGF, APOA2, INSIG1, YWHAE, FABP5, ACSL3, LDLR
